# Supplementary material
Source: HighWire-hosted journal article supplement (https://diabetes.diabetesjournals.org/content/suppl/2007/11/16/db07-0394)

Appendix Fig. 2A

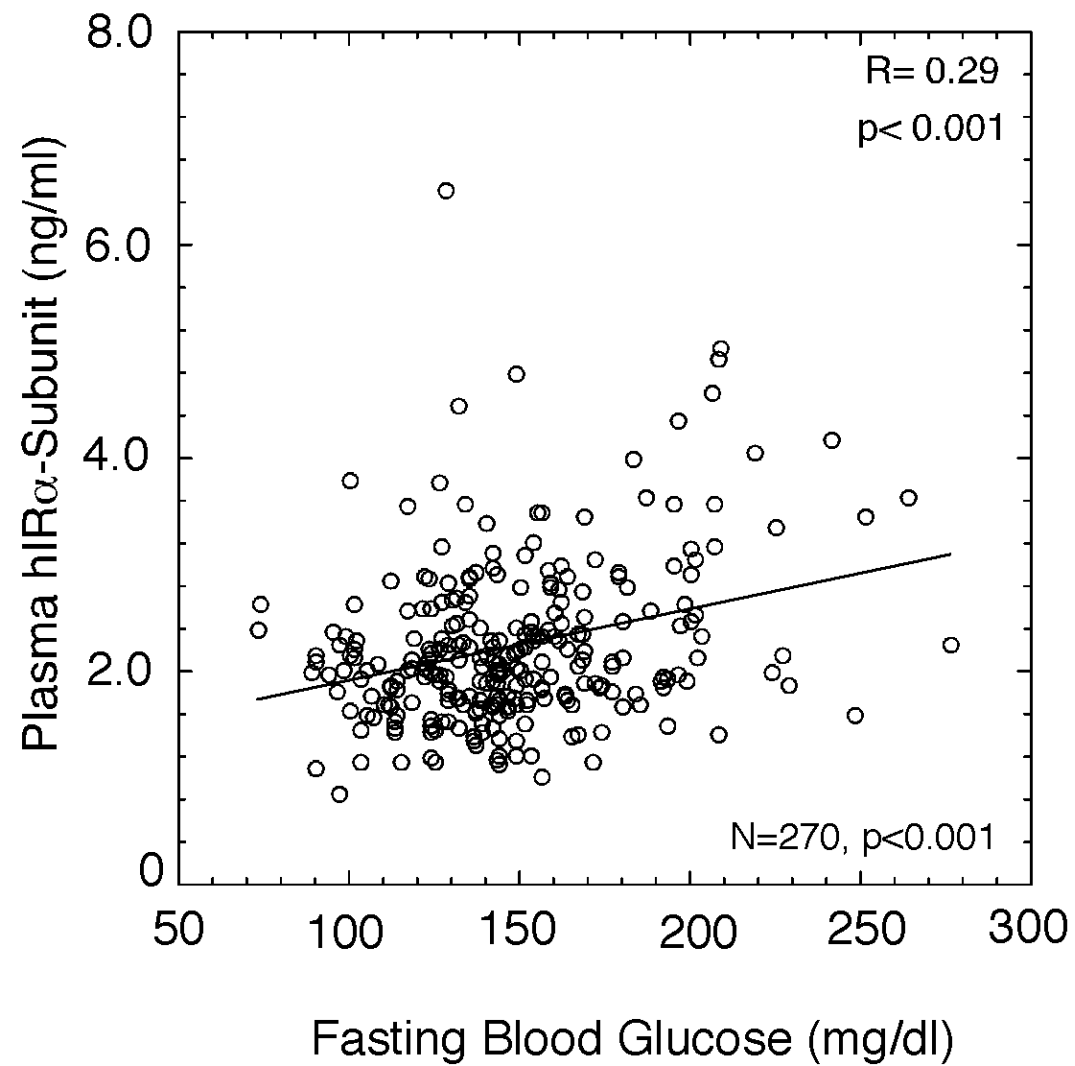

Appendix Fig. 2B

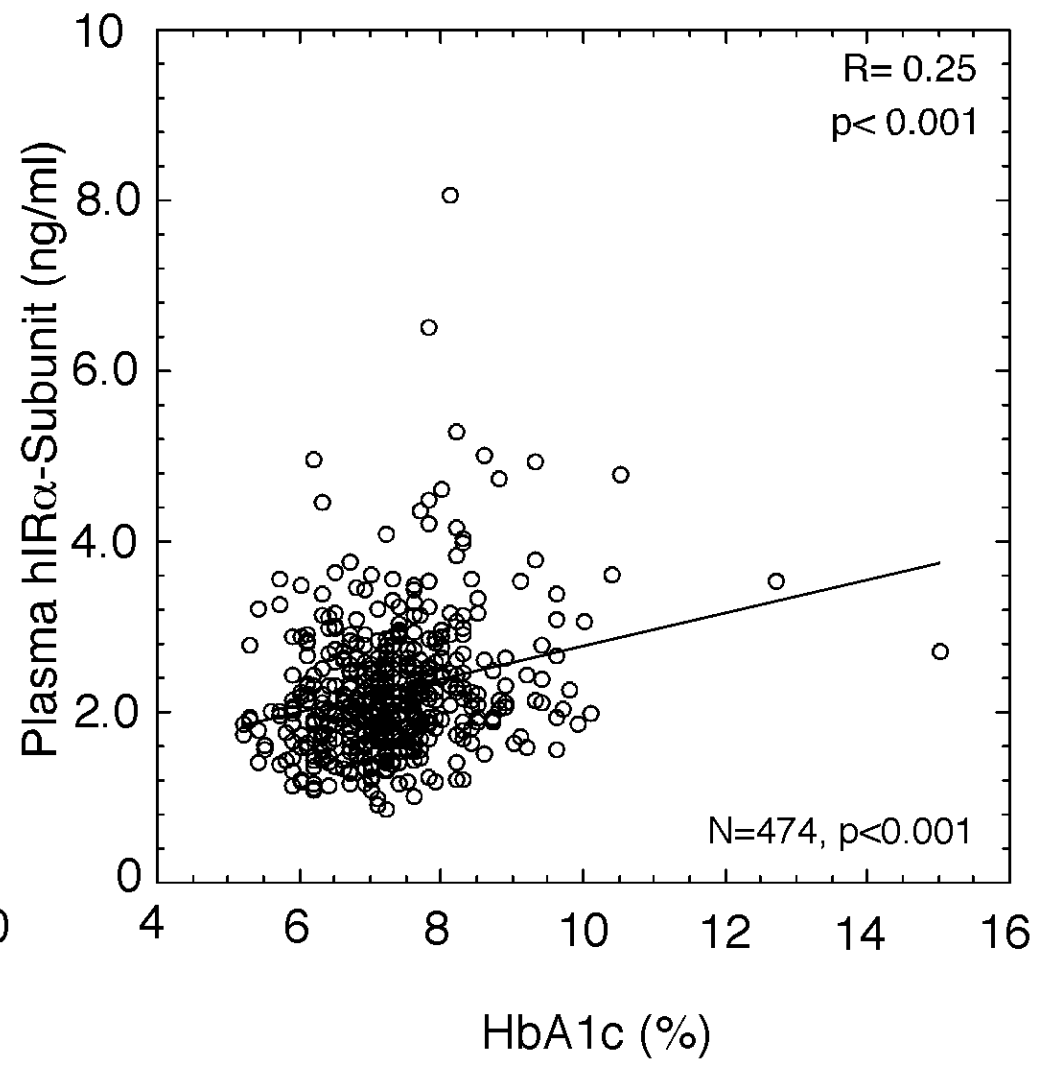

Supplement: DB070394OnlineAppenFig2ABcorrected.pdf [file DB070394OnlineAppenFig2ABcorrected.pdf]
